# Supplementary material for: Association of Cesarean Delivery With Risk of Neurodevelopmental and Psychiatric Disorders in the Offspring: A Systematic Review and Meta-analysis
Source: PubMed Central journal article supplement (PMC6716295; doi:10.1001/jamanetworkopen.2019.10236), 2019-08-28
Supplement: jamanetwopen-2-e1910236-s001.pdf [file jamanetwopen-2-e1910236-s001.pdf]

## Supplementary Online Content

Zhang T, Sidorchuk A, Sevilla-Cermeño L, et al. Association of cesarean delivery with risk of neurodevelopmental and psychiatric disorders in the offspring: a systematic review and meta-analysis. *JAMA Netw Open*. 2019;2(8):e1910236. doi:10.1001/jamanetworkopen.2019.10236

**eTable 1.** Full search strategy

**eTable 2.** Characteristics of the articles excluded due to duplicate data

**eTable 3.** Variables adjusted for or matched by in each included study in the main analysis

**eTable 4.** Leave-one-study-out analyses

**eTable 5.** Subgroup analyses according to country's income level and exposure ascertainment for neurodevelopmental and psychiatric disorders in caesarean-born offspring compared to vaginal-born offspring

**eTable 6.** Meta-regression analyses

**eFigure 1.** Publication bias: Funnel plots and Egger's tests for the main analyses

**eFigure 2.** Contour-enhanced funnel plot for ASD for potential publication bias

**eFigure 3.** Forest Plots of the Results of Random Effects Meta-analyses Stratified by Type of Cesarean Delivery (*Elective* or *Emergency*) and the Disorders

**eFigure 4.** Results of the association between birth by assisted vaginal delivery (compared to *unassisted* vaginal delivery) and neurodevelopmental and psychiatric disorders in the offspring

**eFigure 5.** Sensitivity analyses: crude or least adjusted models

**eReferences**

This supplementary material has been provided by the authors to give readers additional information about their work.

## eTable 1. Full search strategy

Date: 19 December 2018

Topic/research question: Association of obstetric mode of delivery and psychiatric disorders in the offspring

Librarian(s): Magdalena Svanberg & GunBrit Knutssön (Karolinska Institutet University Library)

### eTable 1a. Summary data for each database

| Databases <sup>a</sup>         | Number of hits |
|--------------------------------|----------------|
| Medline (Ovid)                 | 1911           |
| Embase (embase.com)            | 2649           |
| Web of Science Core Collection | 1714           |
| PsycINFO                       | 679            |

<sup>a</sup> Full search strategy was presented for Medline database. Search strategy for other databases was similar to eTable 1b.

### eTable 1b. Search terms for

#### Medline search

| #  | Searches                                                                                                                                                                              | Results |
|----|---------------------------------------------------------------------------------------------------------------------------------------------------------------------------------------|---------|
| 1  | Delivery, Obstetric/                                                                                                                                                                  | 27303   |
| 2  | exp Cesarean Section/                                                                                                                                                                 | 42113   |
| 3  | exp Extraction, Obstetrical/                                                                                                                                                          | 3306    |
| 4  | Obstetrical Forceps/                                                                                                                                                                  | 1621    |
| 5  | ("c section*" or c-section* or cesar* or caesar* or delivery mode or delivery modes or elective cs or "mode of delivery" or obstetric* forcep* or planned cs* or ventouse*).ti,ab,kf. | 63787   |
| 6  | ((obstetric* or vacuum) adj2 extract*).ti,ab,kf.                                                                                                                                      | 1931    |
| 7  | ((abdominal or assisted or forcep* or instrument* or operative or vacuum) adj2 (birth* or deliver* or vd)).ti,ab,kf.                                                                  | 7486    |
| 8  | ((birth or delivery or obstetric*) adj3 complication*).ti,ab,kf.                                                                                                                      | 8687    |
| 9  | (birth histor* or birth information).ti,ab,kf.                                                                                                                                        | 756     |
| 10 | ((obstetric* or peri-natal or perinatal) adj3 (characteristic* or factor* or risk*)).ti,ab,kf.                                                                                        | 11138   |
| 11 | or/1-10                                                                                                                                                                               | 112357  |
| 12 | Mental Disorders/                                                                                                                                                                     | 153526  |
| 13 | exp Anxiety Disorders/                                                                                                                                                                | 75153   |
| 14 | exp "Bipolar and Related Disorders"/                                                                                                                                                  | 37869   |
| 15 | exp "Disruptive, Impulse Control, and Conduct Disorders"/                                                                                                                             | 7998    |
| 16 | exp Dissociative Disorders/                                                                                                                                                           | 4085    |
| 17 | exp Elimination Disorders/                                                                                                                                                            | 5264    |
| 18 | exp "Feeding and Eating Disorders"/                                                                                                                                                   | 28361   |
| 19 | Mood Disorders/                                                                                                                                                                       | 13343   |
| 20 | Depressive Disorder, Major/                                                                                                                                                           | 26811   |
| 21 | Depressive Disorder/                                                                                                                                                                  | 69223   |
| 22 | Depressive Disorder, Treatment-Resistant/                                                                                                                                             | 906     |
| 23 | Dysthymic Disorder/                                                                                                                                                                   | 1113    |
| 24 | Cyclothymic Disorder/                                                                                                                                                                 | 653     |
| 25 | exp Neurodevelopmental Disorders/                                                                                                                                                     | 167979  |
| 26 | Neurotic Disorders/                                                                                                                                                                   | 17943   |
| 27 | exp "Schizophrenia Spectrum and Other Psychotic Disorders"/                                                                                                                           | 140016  |
| 28 | exp Substance-Related Disorders/                                                                                                                                                      | 262328  |
| 29 | exp "Trauma and Stressor Related Disorders"/                                                                                                                                          | 36310   |
| #  | Searches                                                                                                                                                                              | Results |

|    |                                                                                                                                                                                                                                                                                                                                                                    |         |
|----|--------------------------------------------------------------------------------------------------------------------------------------------------------------------------------------------------------------------------------------------------------------------------------------------------------------------------------------------------------------------|---------|
| 30 | (adhd or attention deficit or anorexia or asd or autism or autistic or binge eating or bipolar* or bulimia* or compulsive or depress* or dyscalculia* or dyslexia* or neurosis or neuroses or ocd or obsessive or panic or paranoi* or phobia or phobic or psychosis or psychoses or psychological trauma* or psychotic or ptsd or schizophren* or tics).ti,ab,kf. | 747722  |
| 31 | ((acute stress or adjustment or anxiety or conduct or dissociative or disruptive or eating or hyperactivity or learning or mood or neurodevelopmental or neurotic or personality or posttrauma* or tic or traumatic stress) adj3 (disease* or disorder*)).ti,ab,kf.                                                                                                | 145950  |
| 32 | ((development* or intellectual*) adj2 (disorder* or disabilit*)).ti,ab,kf.                                                                                                                                                                                                                                                                                         | 31244   |
| 33 | (mental* adj2 (disease* or disorder* or ill* or problem*)).ti,ab,kf.                                                                                                                                                                                                                                                                                               | 90872   |
| 34 | ((alcohol or drug* or substance*) adj3 (abuse or disorder* or misuse)).ti,ab,kf.                                                                                                                                                                                                                                                                                   | 90017   |
| 35 | or/12-34                                                                                                                                                                                                                                                                                                                                                           | 1361923 |
| 36 | exp Case-Control Studies/                                                                                                                                                                                                                                                                                                                                          | 960041  |
| 37 | Control Groups/                                                                                                                                                                                                                                                                                                                                                    | 1601    |
| 38 | Matched-Pair Analysis/                                                                                                                                                                                                                                                                                                                                             | 4661    |
| 39 | exp Cohort studies/                                                                                                                                                                                                                                                                                                                                                | 1807116 |
| 40 | Cross-Sectional Studies/                                                                                                                                                                                                                                                                                                                                           | 281284  |
| 41 | observational study.pt.                                                                                                                                                                                                                                                                                                                                            | 55739   |
| 42 | Registries/                                                                                                                                                                                                                                                                                                                                                        | 77457   |
| 43 | Prevalence/                                                                                                                                                                                                                                                                                                                                                        | 261164  |
| 44 | (cohort* or cross sectional or control group* or longitudinal or observational or prevalence or prospective or register stud* or registr* or retrospective or transversal).ti,ab,kf.                                                                                                                                                                               | 2576728 |
| 45 | (case* adj5 control*).ti,ab,kf.                                                                                                                                                                                                                                                                                                                                    | 171126  |
| 46 | (case adj3 comparison*).ti,ab,kf.                                                                                                                                                                                                                                                                                                                                  | 2894    |
| 47 | or/36-46                                                                                                                                                                                                                                                                                                                                                           | 3768258 |
| 48 | exp Child/                                                                                                                                                                                                                                                                                                                                                         | 1801194 |
| 49 | Adolescent/                                                                                                                                                                                                                                                                                                                                                        | 1901581 |
| 50 | Infant/                                                                                                                                                                                                                                                                                                                                                            | 750175  |
| 51 | Siblings/                                                                                                                                                                                                                                                                                                                                                          | 10077   |
| 52 | Twin study/                                                                                                                                                                                                                                                                                                                                                        | 8005    |
| 53 | Prenatal Exposure Delayed Effects/                                                                                                                                                                                                                                                                                                                                 | 26420   |
| 54 | (adoles* or adult* or boy* or child* or girl* or infant* or infancy or kid or kids or offspring or school age or schoolchild* or sibling* or teen* or toddler* or twin*).ti,ab,kf.                                                                                                                                                                                 | 2855577 |
| 55 | or/48-54                                                                                                                                                                                                                                                                                                                                                           | 4503500 |
| 56 | 11 and 35 and 47 and 55                                                                                                                                                                                                                                                                                                                                            | 1911    |

**eTable 2.** Characteristics of the articles excluded due to duplicate data

| Study                         | Study location Period   | Study design | Number of participants |                  | Outcome(s)                            | Outcome assessments                                                                               | Offspring' age range | Variables adjusted for                                                                                 | Matched factors       | Newcastle-Ottawa score |
|-------------------------------|-------------------------|--------------|------------------------|------------------|---------------------------------------|---------------------------------------------------------------------------------------------------|----------------------|--------------------------------------------------------------------------------------------------------|-----------------------|------------------------|
|                               |                         |              | Caesarean section      | Vaginal delivery |                                       |                                                                                                   |                      |                                                                                                        |                       |                        |
| Bilder, 2009 <sup>1</sup>     | United States 2002      | Case-Control | 1331                   | 11068            | ASD including Autism, PDD-NOS, and AS | ICD-9 and DSM-IV-TR                                                                               | 8 years old          | Maternal age, gestational length, and parity                                                           | Gender and birth year | 7                      |
| Brimacombe, 2007 <sup>2</sup> | United States 2001-2003 | Cohort       | NR                     | NR               | ASD including autism, PDD-NOS, and AS | DSM-IV, Autism Diagnostic Interview-Revised, Autism Diagnostic Observation Schedule-Generic, CARS | 2 to 18 years        | None                                                                                                   | /                     | 5                      |
| Dalman, 1999 <sup>3</sup>     | Sweden 1973-1995        | Cohort       | NR                     | NR               | Schizophrenia                         | ICD-9 code 295                                                                                    | 10-22 years          | Psychotic illness in mother, maternal age, marital status, child's birth year, birth hospital and sex. | /                     | 8                      |

| Study                     | Study location Period | Study design | Number of participants |                  | Outcome(s)                                                                             | Outcome assessments                                                                                                                                | Offspring' age range                              | Variables adjusted for                                                                | Matched factors | Newcastle-Ottawa score |
|---------------------------|-----------------------|--------------|------------------------|------------------|----------------------------------------------------------------------------------------|----------------------------------------------------------------------------------------------------------------------------------------------------|---------------------------------------------------|---------------------------------------------------------------------------------------|-----------------|------------------------|
|                           |                       |              | Caesarean section      | Vaginal delivery |                                                                                        |                                                                                                                                                    |                                                   |                                                                                       |                 |                        |
| Gunnel, 2003 <sup>4</sup> | Sweden 1973-1997      | Cohort       | 20,558                 | 226,097          | Non-affective psychosis                                                                | ICD-9 codes 295, 297-299 and ICD-10 codes F20, F21-F29                                                                                             | Mean age at first hospital admission was 21 years | None                                                                                  | /               | 6                      |
| Nilsen, 2013 <sup>5</sup> | Norway 1999-2010      | Cohort       | 41,279                 | 260,081          | ASD, including childhood autism, atypical autism, AS, other PDD, and PDD, unspecified. | the Autism Diagnostic Interview - Revised, the Autism Diagnostic Observation Schedule, DSM-IV, and ICD-10 codes F84.0, F84.1, F84.5, F84.8, F84.9. | 3-11 years                                        | Year of birth, maternal age, paternal age, marital status, parity, and hospital size. | /               | 9                      |

*Abbreviations:* ASD, autism spectrum disorders; PDD-NOS, pervasive developmental disorder-not otherwise specified; AS, Asperger's Syndrome; DSM, The Diagnostic and Statistical Manual of Mental Disorders; ICD, the International Statistical Classification of Diseases and Related Health Problems; CARS, Childhood Autism Rating Scale; NR, not reported.

**eTable 3.** Variables adjusted for or matched by in each study included in the main analysis

| Study                           | Adjusted for                                                                                                                                                                                                           | Matched for                                                                                                |
|---------------------------------|------------------------------------------------------------------------------------------------------------------------------------------------------------------------------------------------------------------------|------------------------------------------------------------------------------------------------------------|
| Al-Jammas, 2012 <sup>6</sup>    | /                                                                                                                                                                                                                      | /                                                                                                          |
| Amiri, 2012 <sup>7</sup>        | /                                                                                                                                                                                                                      | /                                                                                                          |
| Axelsson, 2018 <sup>8 a</sup>   | /                                                                                                                                                                                                                      | /                                                                                                          |
| Axelsson, 2019 <sup>9 a</sup>   | /                                                                                                                                                                                                                      | /                                                                                                          |
| Bain, 2000 <sup>10</sup>        | /                                                                                                                                                                                                                      | The obstetric unit of birth, gender, data of birth, maternal age, maternal parity and father's occupation. |
| Bilder, 2013 <sup>11</sup>      | /                                                                                                                                                                                                                      | /                                                                                                          |
| Brander, 2016 <sup>12 a</sup>   | /                                                                                                                                                                                                                      | /                                                                                                          |
| Brander, 2018 <sup>13 a</sup>   | /                                                                                                                                                                                                                      | /                                                                                                          |
| Burstyn, 2010 <sup>14</sup>     | /                                                                                                                                                                                                                      | /                                                                                                          |
| Byrne, 2000 <sup>15</sup>       | /                                                                                                                                                                                                                      | Gender, maternal age, parity, social class and home/hospital birth                                         |
| Cak, 2013 <sup>16</sup>         | /                                                                                                                                                                                                                      | /                                                                                                          |
| Chen, 2017 <sup>17 a</sup>      | /                                                                                                                                                                                                                      | /                                                                                                          |
| Chien, 2015 <sup>18</sup>       | /                                                                                                                                                                                                                      | /                                                                                                          |
| Chudal, 2014 <sup>19</sup>      | Maternal age, psychiatric history, education level, birth place, maternal smoking during pregnancy and number of pervious birth                                                                                        | Sex, date of birth and residence in Finland on the first date of diagnosis of the case                     |
| Cnattingius, 1999 <sup>20</sup> | /                                                                                                                                                                                                                      | Year and hospital of birth                                                                                 |
| Cubo, 2014 <sup>21</sup>        | Family history of tics, BMI, and presence of any coexistent comorbid neuropsychiatric disturbances                                                                                                                     | Age and gender                                                                                             |
| Curran, 2015 <sup>22 a</sup>    | /                                                                                                                                                                                                                      | /                                                                                                          |
| Curran, 2016 <sup>23 a</sup>    | /                                                                                                                                                                                                                      | /                                                                                                          |
| Dodds, 2011 <sup>24</sup>       | /                                                                                                                                                                                                                      |                                                                                                            |
| Duan, 2014 <sup>25</sup>        | Parental age, parents' level of education, parents' character, family history of psychiatric disorder, stress, passive smoking, pregnancy complications, premature delivery, jaundice, threatened abortion, infections | age and gender                                                                                             |
| Durkin, 2015 <sup>26</sup>      | /                                                                                                                                                                                                                      | /                                                                                                          |
| El-Baz, 2011 <sup>27</sup>      | /                                                                                                                                                                                                                      | Age, gender, environment and habit                                                                         |

| <b>Study</b>                    | <b>Adjusted for</b>                                                                                                                                                                                                                                           | <b>Matched for</b>                                                                                                                                                                                |
|---------------------------------|---------------------------------------------------------------------------------------------------------------------------------------------------------------------------------------------------------------------------------------------------------------|---------------------------------------------------------------------------------------------------------------------------------------------------------------------------------------------------|
| Eriksson, 2012 <sup>28</sup>    | /                                                                                                                                                                                                                                                             | /                                                                                                                                                                                                 |
| Geller, 2008 <sup>29</sup>      | /                                                                                                                                                                                                                                                             | Age, gender, socioeconomic status, and family intact status.                                                                                                                                      |
| Glasson, 2004 <sup>30</sup>     | /                                                                                                                                                                                                                                                             | Sex                                                                                                                                                                                               |
| Gourion, 2008 <sup>31</sup>     | Sex, perinatal condition, obstetrical complications, family adversity, maternal diagnostic of lifetime of major depressive disorder                                                                                                                           | /                                                                                                                                                                                                 |
| Guisso, 2018 <sup>32</sup>      | Gender, age, delivery complications, and feeding difficulty, gestation variables, socioeconomic variables (including family history of psychiatric disease).                                                                                                  | /                                                                                                                                                                                                 |
| Gustafsson, 2011 <sup>33</sup>  | /                                                                                                                                                                                                                                                             | /                                                                                                                                                                                                 |
| Haglund, 2011 <sup>34</sup>     | /                                                                                                                                                                                                                                                             | /                                                                                                                                                                                                 |
| Halmoy, 2012 <sup>35</sup>      | Year of birth, maternal age, parity, marital status of mother, educational level of mother                                                                                                                                                                    | /                                                                                                                                                                                                 |
| Hamadé, 2013 <sup>36</sup>      | /                                                                                                                                                                                                                                                             | Age, region                                                                                                                                                                                       |
| Harrison, 2003 <sup>37</sup>    | /                                                                                                                                                                                                                                                             | /                                                                                                                                                                                                 |
| Hultman, 1999 <sup>38</sup>     | /                                                                                                                                                                                                                                                             | Sex, year of birth, and hospital of birth                                                                                                                                                         |
| Hultman, 2002 <sup>39</sup>     | Maternal age, parity, smoking habits during pregnancy, mothers' country of birth, hypertensive diseases, diabetes, pregnancy bleeding, season of birth, gestational age, birth weight for gestational age, Apgar score at 5 minutes, congenital malformations | Sex, year, and hospital of birth                                                                                                                                                                  |
| Hvelplund, 2016 <sup>40 a</sup> | /                                                                                                                                                                                                                                                             | /                                                                                                                                                                                                 |
| Ji, 2018 <sup>41</sup>          | /                                                                                                                                                                                                                                                             | /                                                                                                                                                                                                 |
| Jones, 1998 <sup>42</sup>       | Sex, socioeconomic status at birth, maternal Depression, and maternal smoking                                                                                                                                                                                 | /                                                                                                                                                                                                 |
| Karlsson, 2012 <sup>43</sup>    | /                                                                                                                                                                                                                                                             | Sex, date of birth, birth hospital, and municipality.                                                                                                                                             |
| Kendell, 2000 <sup>44</sup>     | /                                                                                                                                                                                                                                                             | the obstetric unit of birth, gender, date of birth (+2 months), maternal age (+2 years), maternal parity (first baby v. second or subsequent baby) and father's occupation (manual v. non-manual) |
| Ketzer, 2012 <sup>45</sup>      | IQ, maternal ADHD and cigarettes/day during pregnancy.                                                                                                                                                                                                        | Gender and age                                                                                                                                                                                    |
| Kim, 2015 <sup>46</sup>         | Age, gender and socioeconomic status                                                                                                                                                                                                                          | /                                                                                                                                                                                                 |

|                                      |                                                                                                                       |                                                                                    |
|--------------------------------------|-----------------------------------------------------------------------------------------------------------------------|------------------------------------------------------------------------------------|
| Kissin, 2014 <sup>47</sup>           | /                                                                                                                     | /                                                                                  |
| <b>Study</b>                         | <b>Adjusted for</b>                                                                                                   | <b>Matched for</b>                                                                 |
| Leivonen, 2016 <sup>48</sup>         | Maternal age, maternal SES, maternal psychiatric history, paternal age, and paternal psychiatric history.             | Sex, date of birth, and place of birth                                             |
| Maimburg, 2006 <sup>49</sup>         | Paternal age, mothers citizenship, birthweight and gestational age, Apgar, birth defect and irregular foetal position | Sex, year and country of birth                                                     |
| Maramara, 2014 <sup>50</sup>         | /                                                                                                                     | /                                                                                  |
| Matsuishi, 1999 <sup>51</sup>        | /                                                                                                                     | /                                                                                  |
| Micali, 2015 <sup>52</sup>           | Parental social class                                                                                                 | /                                                                                  |
| Mrozek-Budzyn, 2013 <sup>53</sup>    | /                                                                                                                     | Year of birth, gender, and general practitioners                                   |
| Murray, 2016 <sup>54</sup>           | /                                                                                                                     | /                                                                                  |
| O'Neill, 2016 <sup>55</sup>          | Gestational age, small for gestational age, Apgar score at 5min, maternal age, and maternal psychiatric history       | /                                                                                  |
| Ordonez, 2005 <sup>56</sup>          | /                                                                                                                     | /                                                                                  |
| Polo-Kantola, 2014 <sup>57</sup>     | Maternal age, smoking during pregnancy, parity, and maternal psychiatric history.                                     | Sex, date of birth, and place of birth                                             |
| Razaz, 2018 <sup>58 a</sup>          | /                                                                                                                     | /                                                                                  |
| Schieve, 2014 <sup>59</sup>          | /                                                                                                                     | Birth year, sex, maternal country of residence, race-ethnicity, age and education. |
| Silva, 2014 <sup>60</sup>            | Maternal age, Apgar at 5 min, year of birth, and socioeconomic indexes for areas                                      | Year of birth, gender, and socioeconomic status                                    |
| Sucksdorff, 2018 <sup>61 a</sup>     | /                                                                                                                     | Data of birth, sex and place of birth                                              |
| Sussmann, 2009 <sup>62</sup>         | /                                                                                                                     | Age                                                                                |
| Vasconcelos, 2007 <sup>63</sup>      | /                                                                                                                     | Gender and age                                                                     |
| Winkler-Schwartz, 2014 <sup>64</sup> | /                                                                                                                     | /                                                                                  |
| Yip, 2017 <sup>65</sup>              | Gestational age and paternal age                                                                                      | /                                                                                  |
| Zhang, 2010 <sup>66</sup>            | Paternal age at delivery, gender and birth year                                                                       | Gender and birth year                                                              |

<sup>a</sup> Studies originally adjusted for confounders but were re-calculated with 2 by 2 table in our main meta-analysis. Confounders that they originally adjusted for are:



Axelsson, 2018: Childhood antibiotic use, parental age, parental education, maternal marital status, maternal smoking, infant sex, 5-min Apgar score, use of CPAP or a ventilator, asphyxia, parental epilepsy, preeclampsia or hypertension, gestational diabetes, parity, maternal antibiotic use during the pregnancy, maternal infection during the pregnancy, parental psychiatric history

Axelsson, 2019: Childhood antibiotic use, parental age, parental education, maternal marital status, maternal smoking, infant sex, 5-min Apgar score, use of CPAP or a ventilator, asphyxia, parental epilepsy, preeclampsia or hypertension, gestational diabetes, parity, maternal antibiotic use during the pregnancy, maternal infection during the pregnancy, parental psychiatric history

Brander, 2016: Sex, year of birth, age of mother and father, and parity.

Brander, 2018: Sex, year of birth, age of mother and father, and parity.

Chen, 2017: Gestational age, children's and parental characteristics

Curran, 2015: Year of birth, infant sex, maternal age, gestational age, 5-minute Apgar score, maternal and paternal country of birth, small for gestational age, large for gestational age, first born, family income, and maternal and paternal depression, bipolar disorder, and non-affective disorder.

Curran, 2016: Year of birth, infant gender, maternal age, maternal smoking during pregnancy, gestational age, 5-min Apgar score, maternal and paternal country of birth, small for gestational age, large for gestational age, firstborn, family income, maternal and paternal depression, bipolar disorder and non-affective disorder.

Hvelplund, 2016: Gender, gestational age, parents' ethnicity, parity, SGA, cesarean delivery, Apgar score <7 at 5 minutes, and congenital malformations.

Razaz, 2018: Maternal age, country of birth, education, mother cohabits with partner, parity, maternal height, smoking, year of delivery, gestational age at delivery, birth weight for gestational age

Sucksdorff, 2018: Gestational age and weight for gestational age, maternal age, psychiatric history, substance abuse, smoking, socioeconomic status and parity.

**eTable 4.** Leave-one-study-out analyses

| Outcome                                  | Study omitted          | Pooled OR     | 95% CI              |
|------------------------------------------|------------------------|---------------|---------------------|
| Attention-deficit/hyperactivity disorder | Cak, 2013              | 1.17          | (1.08, 1.27)        |
|                                          | Murray, 2016 (Pelotas) | 1.18          | (1.09, 1.28)        |
|                                          | Kim, 2015              | 1.17          | (1.08, 1.27)        |
|                                          | Gustafsson, 2011       | 1.17          | (1.08, 1.27)        |
|                                          | Axelsson, 2018         | 1.2           | (1.10, 1.32)        |
|                                          | Silva, 2014            | 1.17          | (1.08, 1.28)        |
|                                          | Curran, 2016           | 1.2           | (1.07, 1.36)        |
|                                          | Sucksdorff, 2018       | 1.17          | (1.06, 1.28)        |
|                                          | Chen, 2017             | 1.16          | (1.07, 1.26)        |
|                                          | Halmoy, 2012           | 1.15          | (1.05, 1.25)        |
|                                          | Ketzer, 2012           | 1.16          | (1.07, 1.26)        |
|                                          | Ji, 2018               | 1.15          | (1.06, 1.25)        |
|                                          | Murray, 2016 (ALSPAC)  | 1.16          | (1.09, 1.28)        |
|                                          | Amiri, 2012            | 1.13          | (1.08, 1.27)        |
|                                          | <b>Pooled estimate</b> | <b>1.17</b>   | <b>(1.08, 1.27)</b> |
| Autism spectrum disorders                | Ji, 2018               | 1.32          | (1.25 , 1.40)       |
|                                          | Chien, 2015            | 1.34          | (1.26 , 1.43)       |
|                                          | Curran, 2015           | 1.34          | (1.25 , 1.44)       |
|                                          | Glasson, 2004          | 1.31          | (1.24 , 1.39)       |
|                                          | Yip, 2017 (Norway)     | 1.32          | (1.25 , 1.41)       |
|                                          | Matsuishi, 1999        | 1.33          | (1.25 , 1.41)       |
|                                          | Haglund, 2011          | 1.33          | (1.25 , 1.41)       |
|                                          | Winkler-Schwartz, 2014 | 1.33          | (1.25 , 1.41)       |
|                                          | Axelsson, 2019         | 1.35          | (1.28 , 1.42)       |
|                                          | Al-Jammas, 2012        | 1.32          | (1.25 , 1.40)       |
|                                          | Burstyn, 2010          | 1.35          | (1.27 , 1.43)       |
|                                          | Eriksson, 2012         | 1.32          | (1.25 , 1.40)       |
|                                          | Chen, 2017             | 1.33          | (1.25 , 1.41)       |
|                                          | Polo-Kantola, 2014     | 1.32          | (1.24 , 1.40)       |
|                                          | Schieve, 2014          | 1.33          | (1.25 , 1.41)       |
|                                          | Dodds, 2011            | 1.34          | (1.26 , 1.42)       |
|                                          | Yip, 2017 (Finland)    | 1.33          | (1.25 , 1.42)       |
|                                          | Hultman, 2002          | 1.32          | (1.25 , 1.40)       |
|                                          | Duan, 2014             | 1.33          | (1.25 , 1.41)       |
|                                          | Durkin, 2015           | 1.33          | (1.25 , 1.41)       |
|                                          | Mrozek-Budzyn, 2013    | 1.33          | (1.26 , 1.42)       |
|                                          | Maramara, 2014         | 1.34          | (1.26 , 1.42)       |
|                                          | Zhang, 2010            | 1.33          | (1.25 , 1.41)       |
|                                          | Yip, 2017 (WA)         | 1.31          | (1.24 , 1.40)       |
|                                          | Kissin, 2014           | 1.31          | (1.24 , 1.39)       |
|                                          | Hamadé, 2013           | 1.33          | (1.26 , 1.41)       |
|                                          | Maimburg, 2006         | 1.33          | (1.26 , 1.41)       |
|                                          | El-Baz, 2011           | 1.32          | (1.25 , 1.40)       |
| Guisso, 2018                             | 1.33                   | (1.25 , 1.41) |                     |

|                                          | <b>Pooled estimate</b>   | <b>1.33</b>      | <b>(1.25, 1.41)</b> |
|------------------------------------------|--------------------------|------------------|---------------------|
| <b>Outcome</b>                           | <b>Study omitted</b>     | <b>Pooled OR</b> | <b>95% CI</b>       |
| Intellectual disability                  | <b>Chen, 2017</b>        | <b>2.61</b>      | <b>(1.51, 4.53)</b> |
|                                          | Sussmann, 2009           | 1.93             | (0.82, 4.54)        |
|                                          | Bilder, 2013             | 1.26             | (1.00, 1.60)        |
|                                          | <b>Pooled estimate</b>   | <b>1.83</b>      | <b>(0.90, 3.70)</b> |
| Tic disorder                             | Leivonen, 2016           | 2.4              | (0.59, 9.81)        |
|                                          | Brander, 2017            | 2.21             | (0.44, 11.16)       |
|                                          | <b>Cubo, 2014</b>        | <b>1.24</b>      | <b>(1.02, 1.50)</b> |
|                                          | <b>Pooled estimate</b>   | <b>1.31</b>      | <b>(0.98, 1.76)</b> |
| Obsessive-compulsive disorder            | Brander, 2016            | 1.95             | (0.93, 4.11)        |
|                                          | Geller, 2008             | 1.66             | (0.68, 4.02)        |
|                                          | <b>Vasconcelos, 2007</b> | <b>1.13</b>      | <b>(1.08, 1.19)</b> |
|                                          | <b>Pooled estimate</b>   | <b>1.49</b>      | <b>(0.87, 2.56)</b> |
| Eating disorder                          | Cnattingius, 1999        | 1.23             | (0.96, 1.58)        |
|                                          | Razaz, 2018              | 1.25             | (0.93, 1.68)        |
|                                          | Micali, 2015             | 1.20             | (0.82, 1.74)        |
|                                          | Hvelplund, 2016          | 1.08             | (0.98, 1.18)        |
|                                          | <b>Pooled estimate</b>   | <b>1.18</b>      | <b>(0.96, 1.47)</b> |
| Major depression and affective psychoses | Hultman, 1999            | 1.06             | (0.99, 1.14)        |
|                                          | O'Neill, 2016            | 1.2              | (0.97, 1.48)        |
|                                          | Bain, 2000               | 1.06             | (0.98, 1.14)        |
|                                          | Chudal, 2014             | 1.04             | (0.97, 1.13)        |
|                                          | Gourion, 2008            | 1.06             | (0.98, 1.14)        |
|                                          | <b>Pooled estimate</b>   | <b>1.06</b>      | <b>(0.98, 1.14)</b> |
| Non-affective psychoses                  | Karlsson, 2012           | 1.02             | (0.82, 1.27)        |
|                                          | Harrison, 2003           | 1.06             | (0.86, 1.31)        |
|                                          | O'Neill, 2016            | 0.88             | (0.60, 1.28)        |
|                                          | Ordonez, 2005            | 1                | (0.81, 1.24)        |
|                                          | Jones, 1998              | 0.98             | (0.79, 1.22)        |
|                                          | Kendell, 2000            | 0.96             | (0.76, 1.21)        |
|                                          | Byrne, 2000              | 0.87             | (0.69, 1.11)        |
|                                          | <b>Pooled estimate</b>   | <b>0.97</b>      | <b>(0.78, 1.21)</b> |

**eTable 5.** Subgroup analyses according to country's income level and exposure ascertainment for neurodevelopmental and psychiatric disorders in caesarean-born offspring compared to vaginal-born offspring

| Outcome   | Country's income level |                    | P-value | Exposure ascertainment |                    | P-value |
|-----------|------------------------|--------------------|---------|------------------------|--------------------|---------|
|           | High income            | Middle income      |         | Medical records        | Self-report        |         |
|           | OR (95% CI)            | OR (95% CI)        |         | OR (95% CI)            | OR (95% CI)        |         |
| ADHD      | 1.14 (1.06-1.22)**     | 1.27 (0.62-2.59)** | 0.93    | 1.13 (1.05-1.21)**     | 1.71 (0.84-3.49)** | 0.51    |
| ASD       | 1.33 (1.24-1.42)*      | 1.37 (1.14-1.64)   | 0.60    | 1.34 (1.26-1.42)**     | 1.17 (0.89-1.53)   | 0.56    |
| Psychosis | 1.05 (0.92-1.20)*      | ..                 | NA      | 1.02 (0.91-1.14)       | ..                 | NA      |

*Note:* Results shown are odds ratios with 95% confidence intervals. P-values presented in the table are for group differences. Significant results are highlighted in bold.

*Abbreviations:* ADHD, attention-deficit/hyperactivity disorder; ASD, autism spectrum disorders; OR, odds ratio; CI, confidence interval

NA: calculation of the p value is not applicable.

\* Study heterogeneity medium ( $50% < I^2 < 75%$ ), p-value < 0.05

\*\* Study heterogeneity high ( $I^2 > 75%$ ), p-value < 0.05

**eTable 6.** Meta-regression analyses

|                        | Test of moderators |                        |                 |             | Variance accounted for | Test for residual heterogeneity |                               |    |         |
|------------------------|--------------------|------------------------|-----------------|-------------|------------------------|---------------------------------|-------------------------------|----|---------|
|                        | No. of studies     | Regression coefficient | 95% CI          | p value     |                        | Q <sub>res</sub> statistic      | I <sup>2</sup> <sub>res</sub> | DF | p value |
| <i>For ADHD</i>        |                    |                        |                 |             |                        |                                 |                               |    |         |
| Publication year       | 11                 | -0.03                  | -0.11 - 0.05    | 0.4         | 4.81%                  | 53.09                           | 83.05 %                       | 9  | <0.001  |
| CS use proportion      | 11                 | 0.69                   | -0.75 - 2.14    | 0.31        | 30.14%                 | 62.62                           | 85.63 %                       | 9  | <0.001  |
| Study design           | 11                 | -0.19                  | -0.59 - 0.21    | 0.31        | 0.7%                   | 51.05                           | 82.37 %                       | 9  | <0.001  |
| Country income         | 11                 | -0.78                  | -1.41 - (-0.16) | <b>0.02</b> | <b>77.3%</b>           | 47.24                           | 80.95 %                       | 9  | <0.001  |
| Exposure ascertainment | 11                 | 0.74                   | 0.12-1.35       | <b>0.02</b> | <b>76.48%</b>          | 47.72                           | 81.14 %                       | 9  | <0.001  |
| <i>For ASD</i>         |                    |                        |                 |             |                        |                                 |                               |    |         |
| Publication year       | 28                 | -0.01                  | -0.03 - 0.003   | 0.11        | 23.49%                 | 68.94                           | 62.29 %                       | 26 | <0.001  |
| CS use proportion      | 28                 | 0.26                   | -0.33 - 0.85    | 0.38        | -1.39%                 | 87.81                           | 70.39 %                       | 26 | <0.001  |
| Study design           | 28                 | -0.11                  | -0.25 - 0.03    | 0.12        | 23.32%                 | 71.63                           | 63.70 %                       | 26 | <0.001  |
| Country income         | 28                 | -0.11                  | -0.38 - 0.15    | 0.39        | -0.03%                 | 87.57                           | 70.31 %                       | 26 | <0.001  |
| Exposure ascertainment | 27                 | -0.17                  | -0.35 - 0.10    | 0.26        | -1.67%                 | 86.81                           | 71.2%                         | 25 | <0.001  |

*Abbreviations:* ADHD, attention-deficit/hyperactivity disorder; ASD, autism spectrum disorders; CI, confidence interval; DF: degree of freedom

**eFigure 1.** Publication bias: Funnel plots and Egger's tests for the main analyses

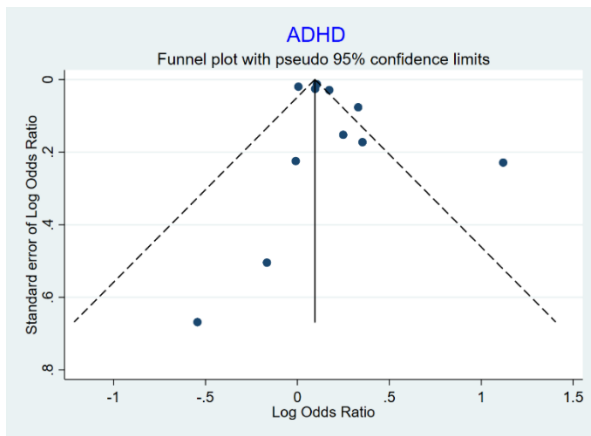

Egger's test for small-study effects:  
Regress standard normal deviate of intervention effect estimate against its standard error

Number of studies = 11

Root MSE = 2.455

| Std_Eff | Coef.    | Std. Err. | t    | P> t  | [95% Conf. Interval] |          |
|---------|----------|-----------|------|-------|----------------------|----------|
| slope   | .0707799 | .0308947  | 2.29 | 0.048 | .0008913             | .1406685 |
| bias    | 1.180413 | .9986772  | 1.18 | 0.268 | -1.078752            | 3.439577 |

Test of H0: no small-study effects

P = 0.268

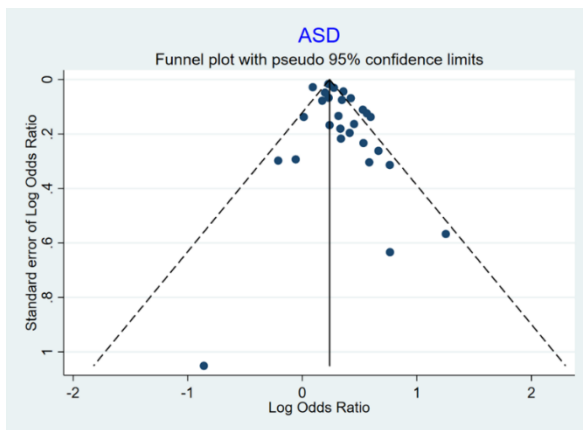

Egger's test for small-study effects:  
Regress standard normal deviate of intervention effect estimate against its standard error

Number of studies = 28

Root MSE = 1.699

| Std_Eff | Coef.    | Std. Err. | t    | P> t  | [95% Conf. Interval] |          |
|---------|----------|-----------|------|-------|----------------------|----------|
| slope   | .2000437 | .0251453  | 7.96 | 0.000 | .1483567             | .2517307 |
| bias    | .9799376 | .4305486  | 2.28 | 0.031 | -.0949322            | 1.864943 |

Test of H0: no small-study effects

P = 0.031

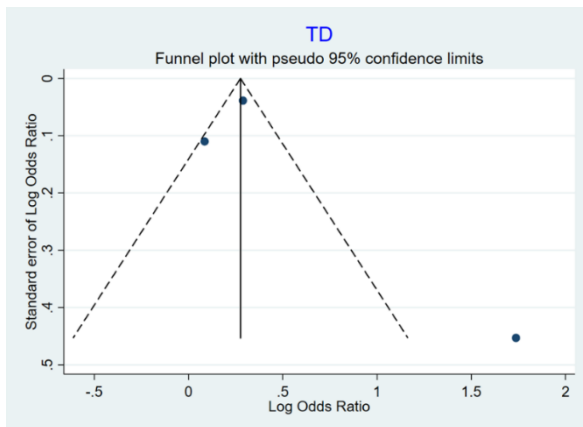

Egger's test for small-study effects:  
Regress standard normal deviate of intervention effect estimate against its standard error

Number of studies = 3

Root MSE = 3.268

| Std_Eff | Coef.    | Std. Err. | t    | P> t  | [95% Conf. Interval] |          |
|---------|----------|-----------|------|-------|----------------------|----------|
| slope   | .1994783 | .1895517  | 1.05 | 0.484 | -2.209005            | 2.607961 |
| bias    | 1.55448  | 3.014338  | 0.52 | 0.697 | -36.74632            | 39.85527 |

Test of H0: no small-study effects

P = 0.697

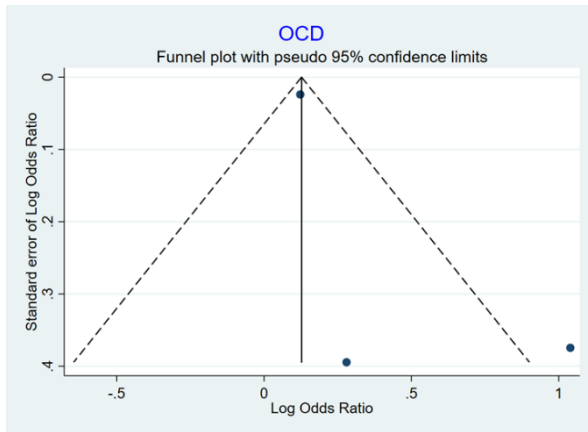

Egger's test for small-study effects:  
Regress standard normal deviate of intervention  
effect estimate against its standard error

Number of studies = 3 Root MSE = 1.452

| Std_Eff | Coef.    | Std. Err. | t    | P> t  | [95% Conf. Interval] |          |
|---------|----------|-----------|------|-------|----------------------|----------|
| slope   | .08673   | .0454468  | 1.91 | 0.307 | -.4907261            | .6641861 |
| bias    | 1.514836 | 1.099458  | 1.38 | 0.400 | -12.45511            | 15.48478 |

Test of H0: no small-study effects P = 0.400

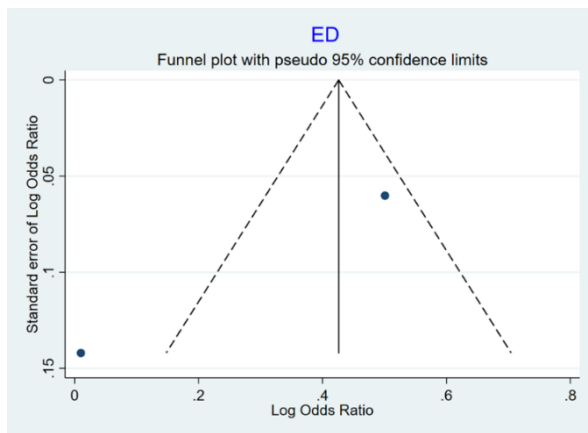

Egger's test was not performed since there were less than three studies were included.

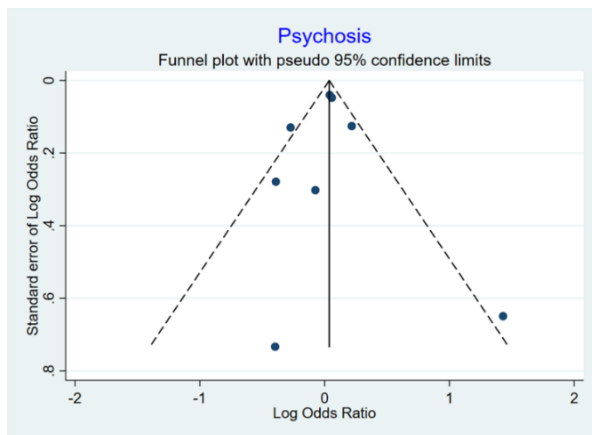

Egger's test for small-study effects:  
Regress standard normal deviate of intervention  
effect estimate against its standard error

Number of studies = 8 Root MSE = 1.594

| Std_Eff | Coef.    | Std. Err. | t     | P> t  | [95% Conf. Interval] |          |
|---------|----------|-----------|-------|-------|----------------------|----------|
| slope   | .0489981 | .0661743  | 0.74  | 0.487 | -.1129245            | .2109208 |
| bias    | -.206496 | .817432   | -0.25 | 0.809 | -2.20668             | 1.793688 |

Test of H0: no small-study effects P = 0.809

**eFigure 2.** Contour-enhanced funnel plot for ASD for potential publication bias

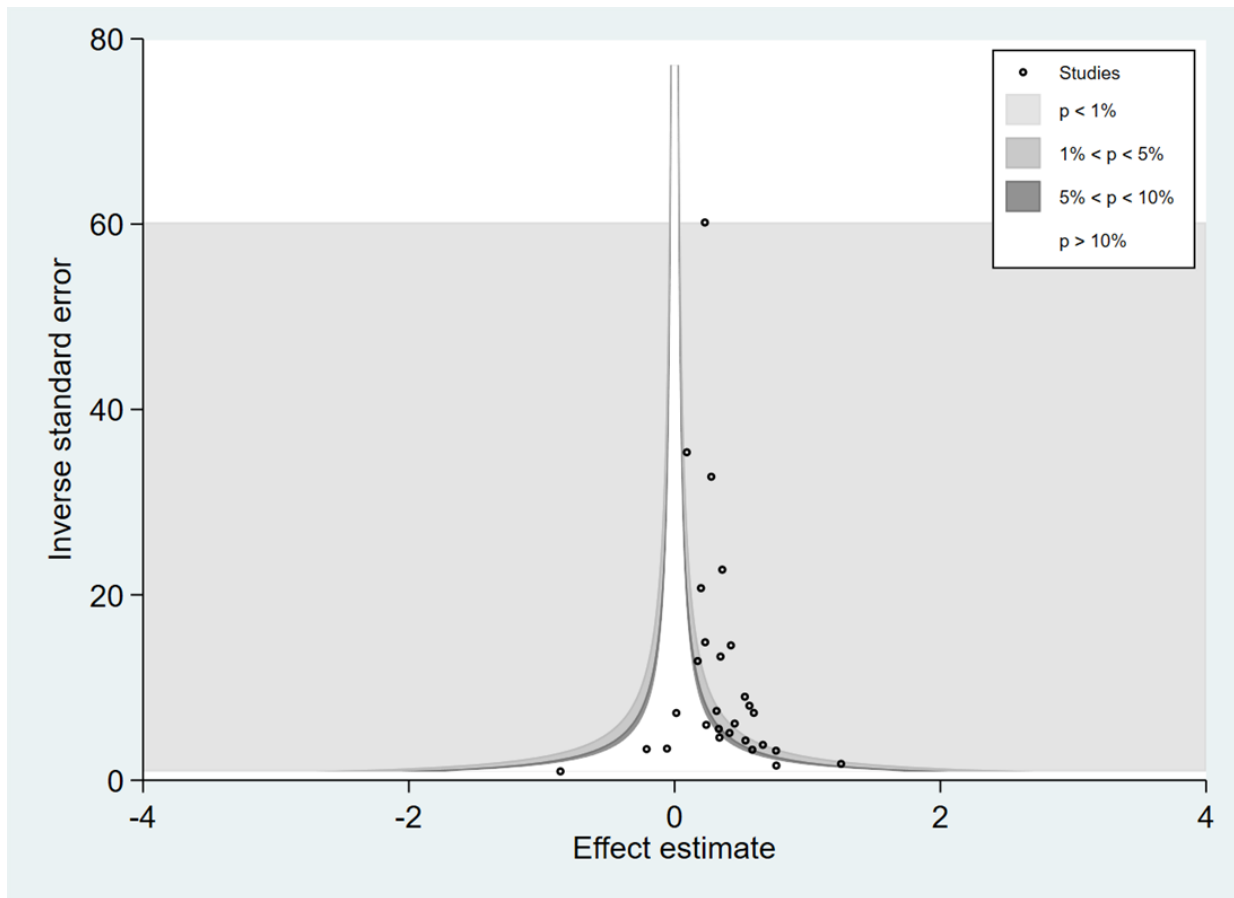

There is a suggestion of missing studies on the darker area (i.e. indicating high statistical significance) of left-hand-side of the plot, for which publication bias is a plausible explanation.



**eFigure 3.** Forest Plots of the Results of Random Effects Meta-analyses Stratified by Type of Cesarean Delivery (Elective or Emergency) and the Disorders

**A.** *Elective* caesarean section compared to *unassisted* vaginal delivery

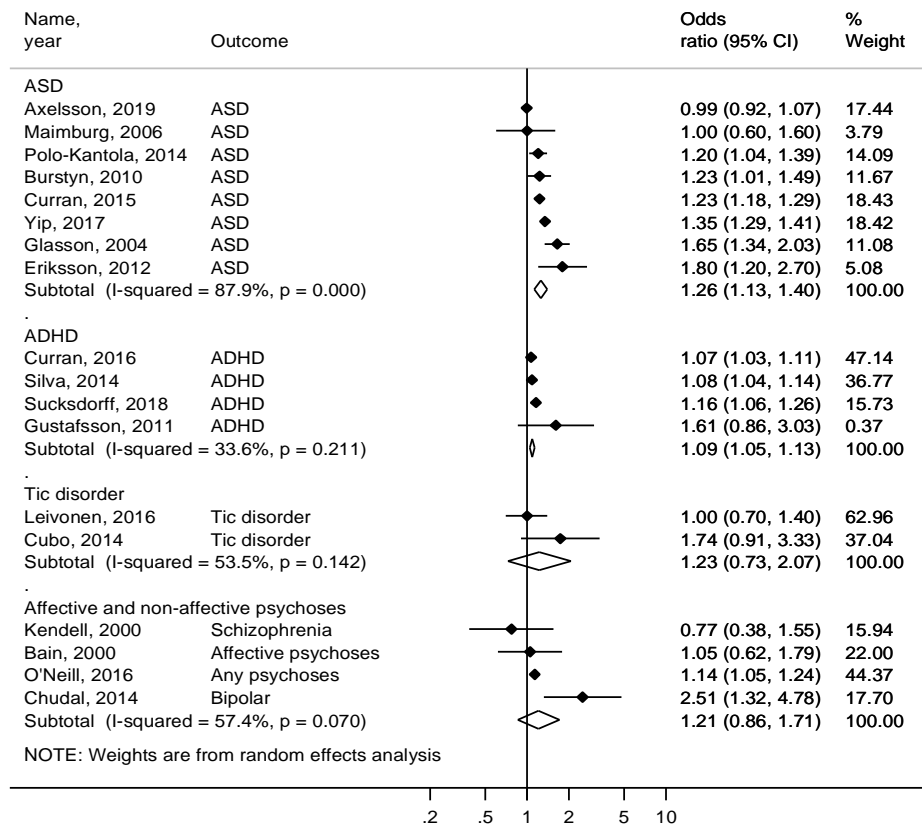

**B.** *Emergency* caesarean section compared to *unassisted* vaginal delivery

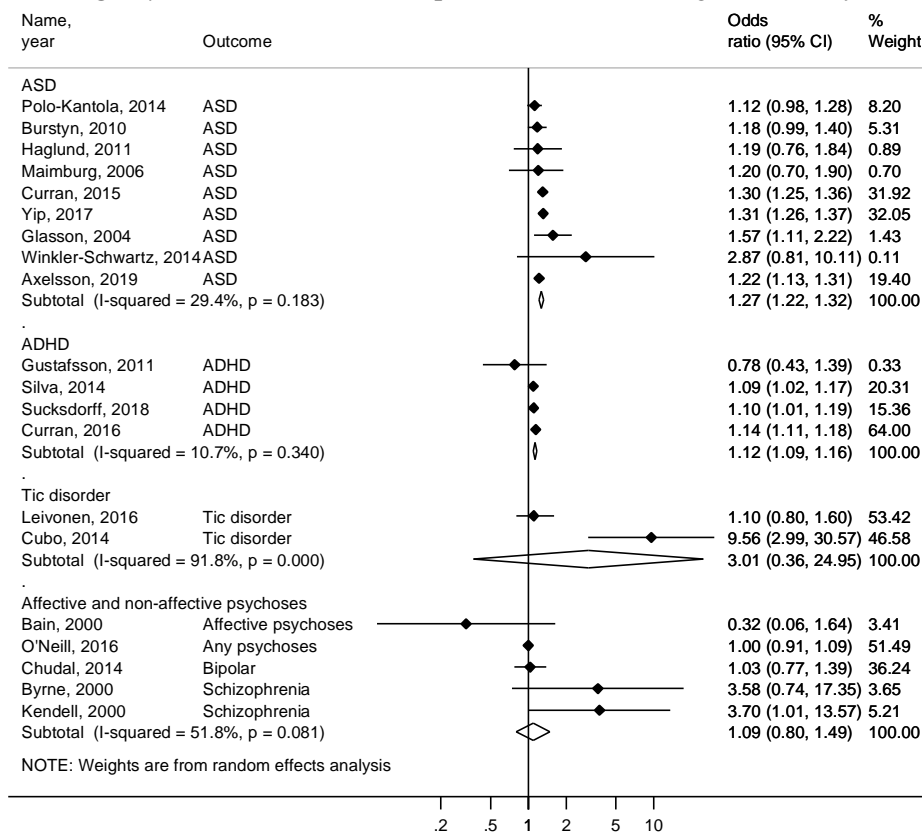

**eFigure 4.** Results of the association between birth by *assisted* vaginal delivery (compared to *unassisted* vaginal delivery) and neurodevelopmental and psychiatric disorders in the offspring

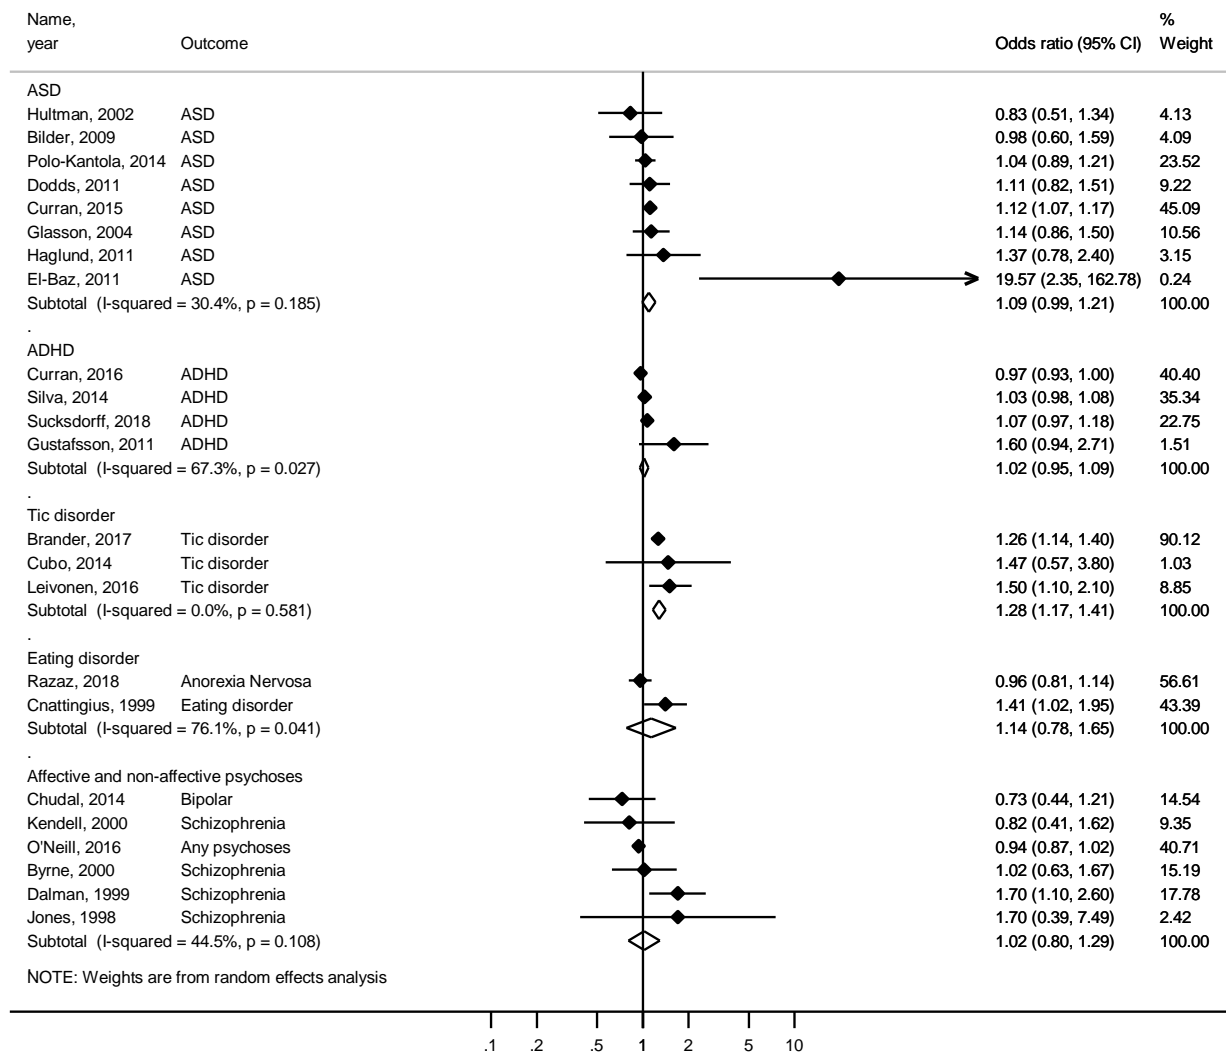

Abbreviations: ADHD: attention-deficit hyperactivity disorder; ASD: autism spectrum disorder

**eFigure 5.** Sensitivity analysis: Crude or least adjusted models

**eFigure 5a.** Forest plot of crude or least adjusted estimates of the association between birth by *caesarean section* and neurodevelopmental and psychiatric disorders in the offspring

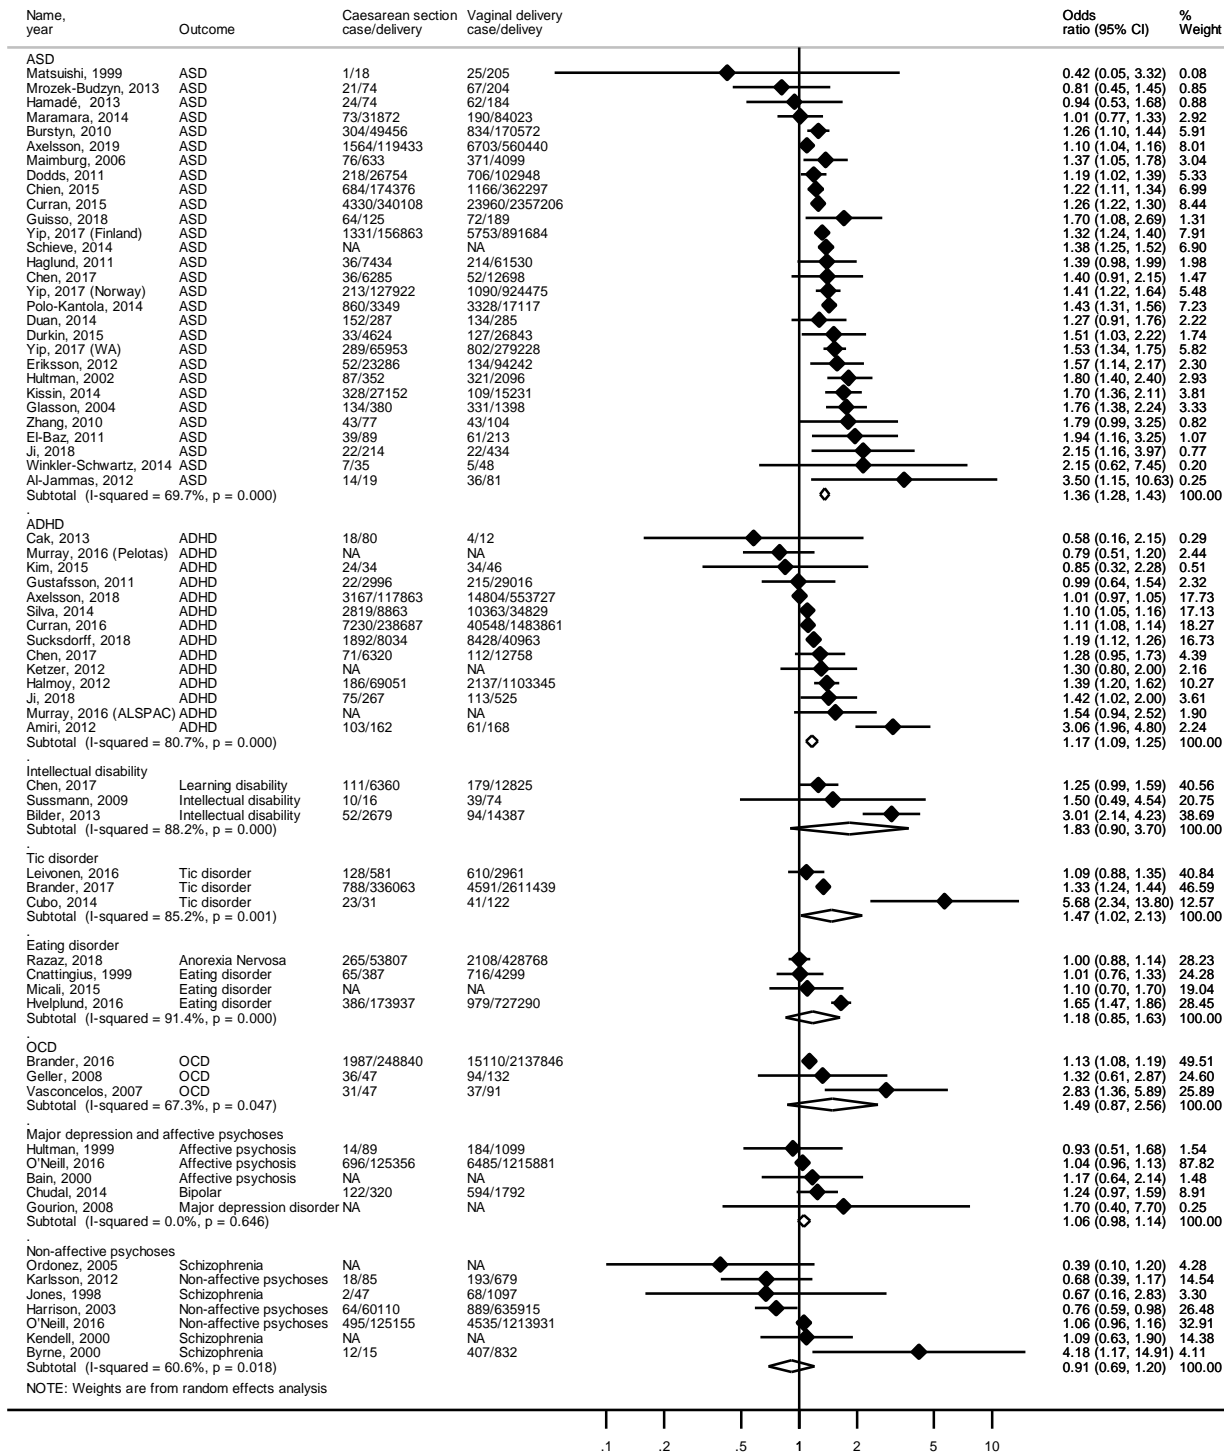

Abbreviations: NA: not available; ADHD: attention-deficit hyperactivity disorder; ASD: autism spectrum disorder; OCD: obsessive-compulsive disorder;

**eFigure 5b.** Forest plot of crude or least adjusted estimates of the association between birth by *emergency CS* and neurodevelopmental and psychiatric disorders in the offspring

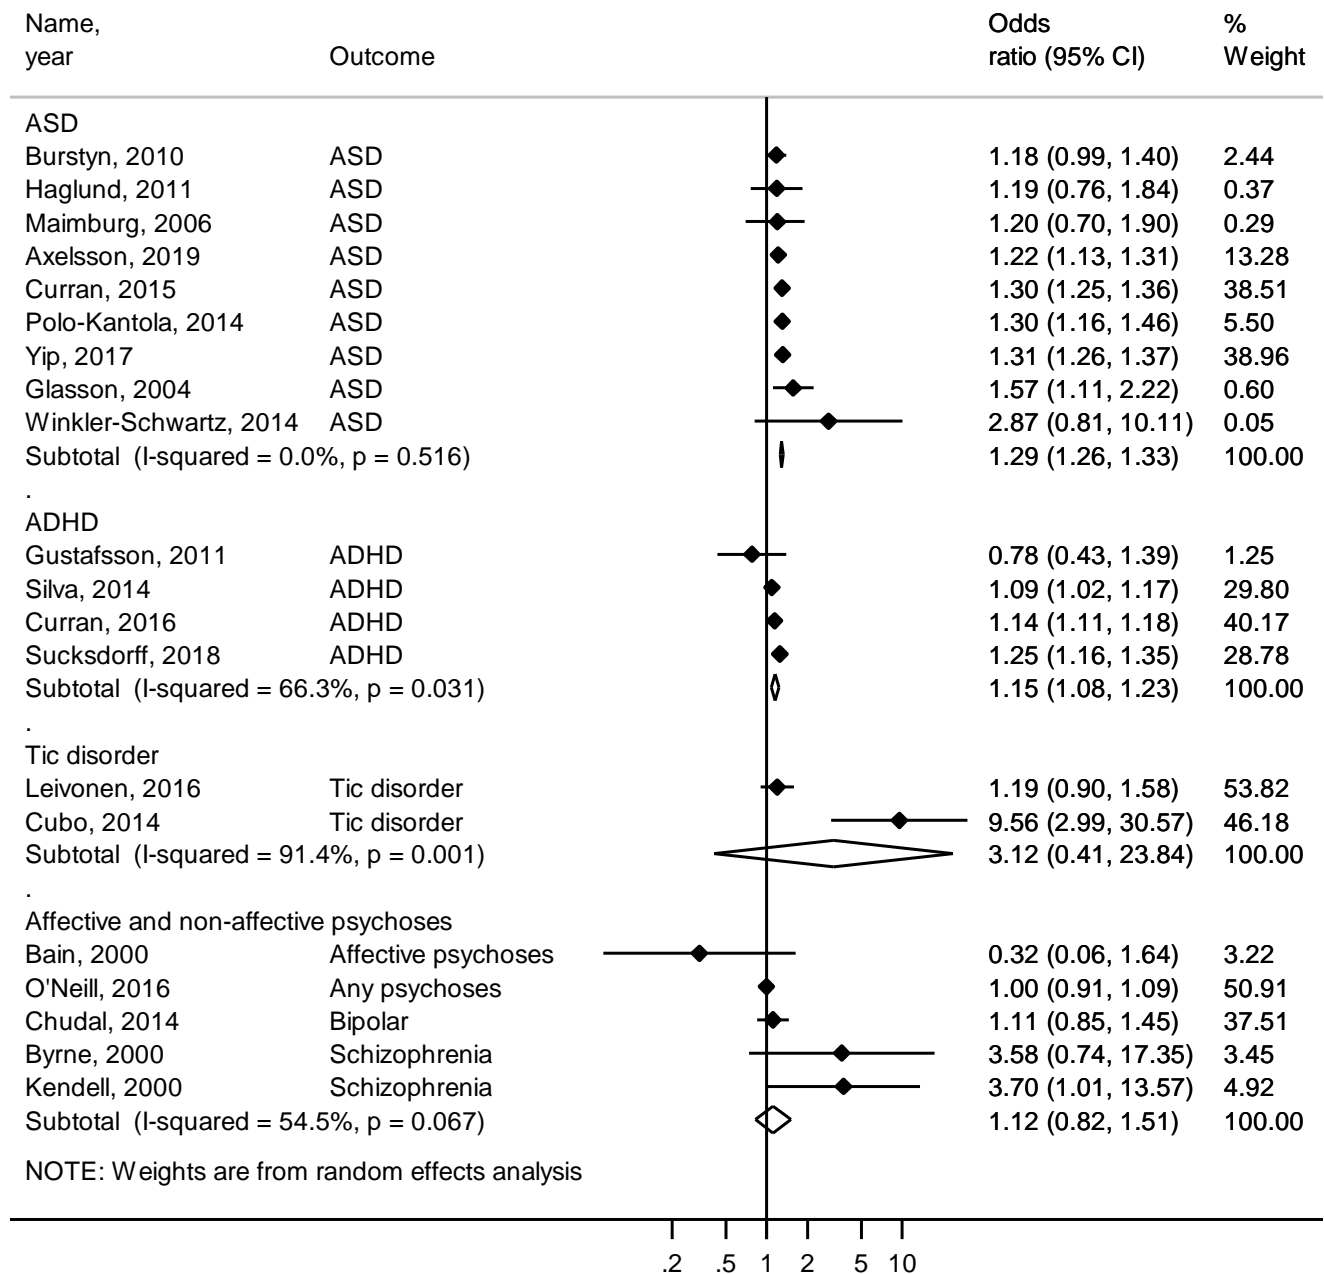

NOTE: Weights are from random effects analysis

Abbreviations: NA: not available; ADHD: attention-deficit hyperactivity disorder; ASD: autism spectrum disorder

**eFigure 5c.** Forest plot of crude or least adjusted estimates of the association between birth by elective CS and psychiatric disorders in the offspring

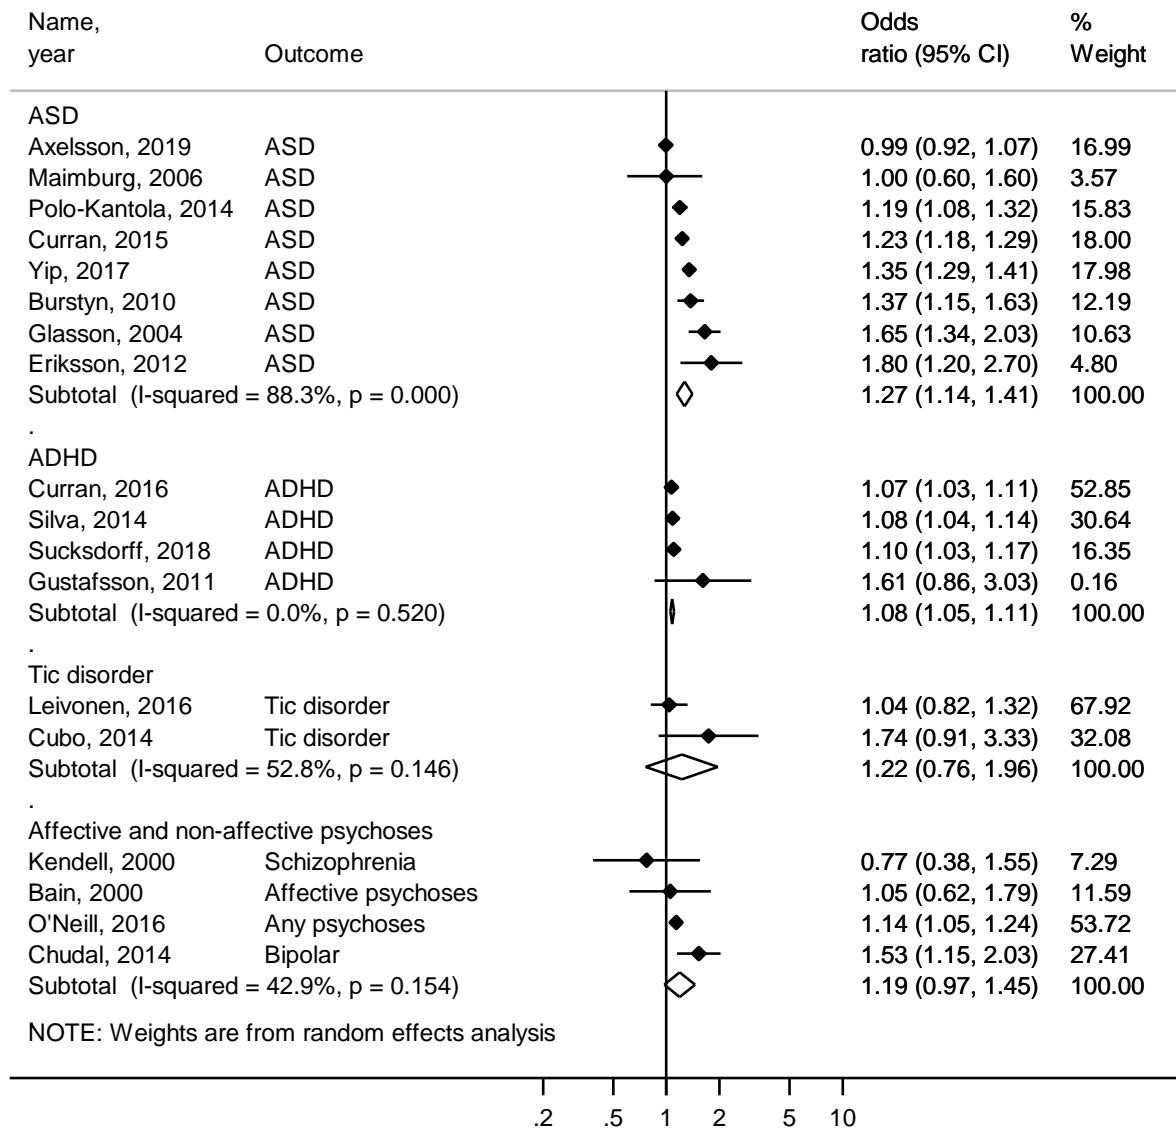

Abbreviations: NA: not available; ADHD: attention-deficit hyperactivity disorder; ASD: autism spectrum disorder

**eFigure 5d.** Forest plot of crude or least adjusted estimates of the association between birth by *assisted* VD and psychiatric disorders in the offspring

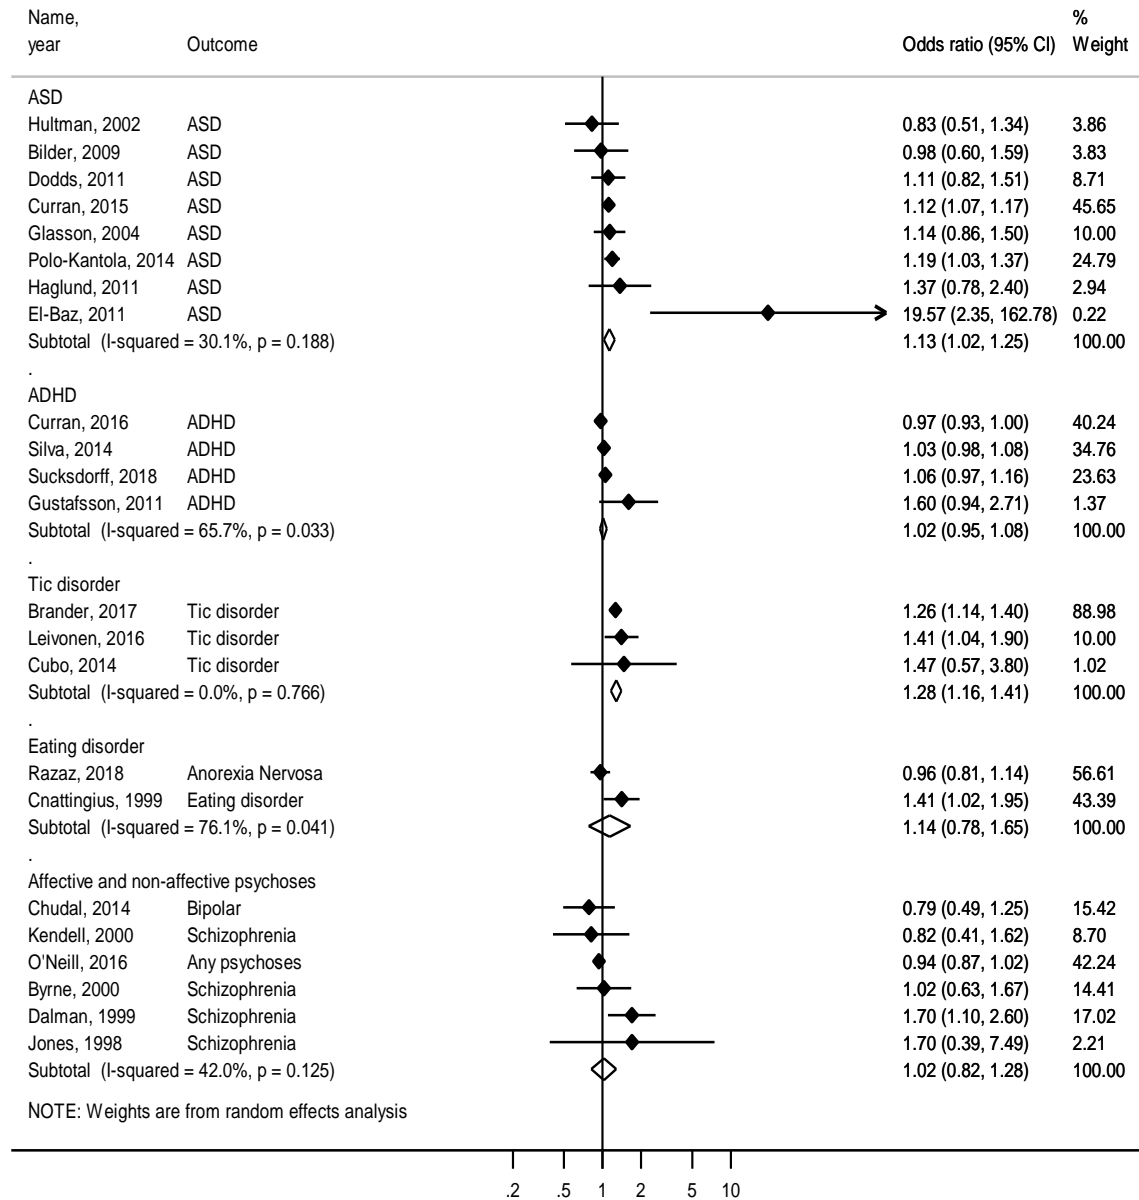

NOTE: Weights are from random effects analysis

Abbreviations: NA: not available; ADHD: attention-deficit hyperactivity disorder; ASD: autism spectrum disorder

## eReferences

1. Bilder D, Pinborough-Zimmerman J, Miller J, McMahon W. Prenatal, perinatal, and neonatal factors associated with autism spectrum disorders. *Pediatrics*. 2009;123(5):1293-1300.
2. Brimacombe M, Ming X, Lamendola M. Prenatal and birth complications in autism. *Matern Child Health J*. 2007;11(1):73-79.
3. Dalman C, Allebeck P, Cullberg J, Grunewald C, Koster M. Obstetric complications and the risk of schizophrenia: a longitudinal study of a national birth cohort. *Arch Gen Psychiatry*. 1999;56(3):234-240.
4. Gunnell D, Rasmussen F, Fouskakis D, Tynelius P, Harrison G. Patterns of fetal and childhood growth and the development of psychosis in young males: A cohort study. *Am J Epidemiol*. 2003;158(4):291-300.
5. Nilsen RM, Suren P, Gunnes N, et al. Analysis of self-selection bias in a population-based cohort study of autism spectrum disorders. *Paediatr Perinat Epidemiol*. 2013;27(6):553-563.
6. Al-Jammas IK, Al-Dobooni RM. Prenatal and perinatal risk factors in autistic disorders. *Arab Journal of Psychiatry*. 2012;23(2):108-114.
7. Amiri S, Malek A, Sadegfard M, Abdi S. Pregnancy-related maternal risk factors of attention-deficit hyperactivity disorder: a case-control study. *ISRN pediater*. 2012;2012:458064.
8. Axelsson PB, Clausen TD, Petersen AH, et al. Investigating the effects of cesarean delivery and antibiotic use in early childhood on risk of later attention deficit hyperactivity disorder. *J Child Psychol Psychiatry*. 2018;23:23.
9. Axelsson PB, Clausen TD, Petersen AH, et al. Relation Between Infant Microbiota and Autism?: Results from a National Cohort Sibling Design Study. *Epidemiology*. 2019;30(1):52-60.
10. Bain M, Juszczak E, McInney K, Kendell RE. Obstetric complications and affective psychoses. Two case-control studies based on structured obstetric records. *Br J Psychiatry*. 2000;176:523-526.
11. Bilder DA, Pinborough-Zimmerman J, Bakian AV, et al. Prenatal and perinatal factors associated with intellectual disability. *Am J Intellect Dev Disabil*. 2013;118(2):156-176.
12. Brander G, Rydell M, Kuja-Halkola R, et al. Association of Perinatal Risk Factors With Obsessive-Compulsive Disorder A Population-Based Birth Cohort, Sibling Control Study. *JAMA Psychiatry*. 2016;73(11):1135-1144.
13. Brander G, Rydell M, Kuja-Halkola R, et al. Perinatal risk factors in Tourette's and chronic tic disorders: a total population sibling comparison study. *Mol Psychiatry*. 2018;23(5):1189-1197.
14. Burstyn I, Sithole F, Zwaigenbaum L. Autism spectrum disorders, maternal characteristics and obstetric complications among singletons born in Alberta, Canada. *Chronic Dis Can*. 2010;30(4):125-134.
15. Byrne M, Browne R, Mulryan N, et al. Labour and delivery complications and schizophrenia. Case-control study using contemporaneous labour ward records. *Br J Psychiatry*. 2000;176:531-536.
16. Çak HT, Gökler B. Attention deficit hyperactivity disorder and associated perinatal risk factors in preterm children. *Turk Pediatri Arsivi*. 2013;48(4):315-322.
17. Chen G, Chiang WL, Shu BC, et al. Associations of caesarean delivery and the occurrence of neurodevelopmental disorders, asthma or obesity in childhood based on Taiwan birth cohort study. *BMJ Open*. 2017;7(9):e017086.
18. Chien L-N, Lin H-C, Shao Y-HJ, Chiou S-T, Chiou H-Y. Risk of autism associated with general anesthesia during Cesarean delivery: A population-based birth-cohort analysis. *J Autism Dev Disord*. 2015;45(4):932-942.
19. Chudal R, Sourander A, Polo-Kantola P, et al. Perinatal factors and the risk of bipolar disorder in Finland. *J Affect Disord*. 2014;155:75-80.
20. Cnattingius S, Hultman CM, Dahl M, Sparen P. Very preterm birth, birth trauma, and the risk of anorexia nervosa among girls. *Arch Gen Psychiatry*. 1999;56(7):634-638.
21. Cubo E, Hortiguera M, Jorge-Roldan S, et al. Prenatal and Perinatal Morbidity in Children with Tic Disorders: A Mainstream School-based Population Study in Central Spain. *Tremor Other Hyperkinet Mov (N Y)*. 2014;4:272.
22. Curran EA, Dalman C, Kearney PM, et al. Association Between Obstetric Mode of Delivery and Autism Spectrum Disorder: A Population-Based Sibling Design Study. *JAMA Psychiatry*. 2015;72(9):935-942.
23. Curran EA, Khashan AS, Dalman C, et al. Obstetric mode of delivery and attention-deficit/hyperactivity disorder: a sibling-matched study. *Int J Epidemiol*. 2016;45(2):532-542.
24. Dodds L, Fell DB, Shea S, et al. The role of prenatal, obstetric and neonatal factors in the development of autism. *J Autism Dev Disord*. 2011;41(7):891-902.
25. Duan G, Yao M, Ma Y, Zhang W. Perinatal and background risk factors for childhood autism in central China. *Psychiatry Res*. 2014;220(1-2):410-417.

26. Durkin MS, DuBois LA, Maenner MJ. Inter-Pregnancy Intervals and the Risk of Autism Spectrum Disorder: Results of a Population-Based Study. *J Autism Dev Disord*. 2015;45(7):2056-2066.
27. El-Baz F, Ismael NA, El-Din SMN. Risk factors for autism: An Egyptian study. *Egypt J Med Hum Genet*. 2011;12(1):31-38.
28. Eriksson MA, Westerlund J, Anderlid BM, Gillberg C, Fernell E. First-degree relatives of young children with autism spectrum disorders: some gender aspects. *Res Dev Disabil*. 2012;33(5):1642-1648.
29. Geller DA, Wieland N, Carey K, et al. Perinatal factors affecting expression of obsessive compulsive disorder in children and adolescents. *J Child Adolesc Psychopharmacol*. 2008;18(4):373-379.
30. Glasson EJ, Bower C, Petterson B, et al. Perinatal factors and the development of autism: a population study. *Arch Gen Psychiatry*. 2004;61(6):618-627.
31. Gourion D, Arseneault L, Vitaro F, et al. Early environment and major depression in young adults: a longitudinal study. *Psychiatry Res*. 2008;161(2):170-176.
32. Guisso DR, Saadeh FS, Saab D, et al. Association of Autism with Maternal Infections, Perinatal and Other Risk Factors: A Case-Control Study. *J Autism Dev Disord*. 2018;48(6):2010-2021.
33. Gustafsson P, Källén K. Perinatal, maternal, and fetal characteristics of children diagnosed with attention-deficit-hyperactivity disorder: Results from a population-based study utilizing the Swedish Medical Birth Register. *Dev Med Child Neurol*. 2011;53(3):263-268.
34. Haglund NG, Kallen KB. Risk factors for autism and Asperger syndrome. Perinatal factors and migration. *Autism*. 2011;15(2):163-183.
35. Halmoy A, Klungsoyr K, Skjaerven R, Haavik J. Pre- and perinatal risk factors in adults with attention-deficit/hyperactivity disorder. *Biol Psychiatry*. 2012;71(5):474-481.
36. Hamade A, Salameh P, Medlej-Hashim M, et al. Autism in children and correlates in Lebanon: a pilot case-control study. *J*. 2013;13(2):119-124.
37. Harrison G, Fouskakis D, Rasmussen F, et al. Association between psychotic disorder and urban place of birth is not mediated by obstetric complications or childhood socio-economic position: a cohort study. *Psychol Med*. 2003;33(4):723-731.
38. Hultman CM, Sparen P, Takei N, Murray RM, Cnattingius S. Prenatal and perinatal risk factors for schizophrenia, affective psychosis, and reactive psychosis of early onset: case-control study. *BMJ*. 1999;318(7181):421-426.
39. Hultman CM, Sparen P, Cnattingius S. Perinatal risk factors for infantile autism. *Epidemiology*. 2002;13(4):417-423.
40. Hvelplund C, Hansen BM, Koch SV, Andersson M, Skovgaard AM. Perinatal Risk Factors for Feeding and Eating Disorders in Children Aged 0 to 3 Years. *Pediatrics*. 2016;137(2):e20152575.
41. Ji Y, Riley AW, Lee LC, et al. Maternal biomarkers of acetaminophen use and offspring attention deficit hyperactivity disorder. *Brain Sci*. 2018;8(7):E127.
42. Jones PB, Rantakallio P, Hartikainen AL, Isohanni M, Sipila P. Schizophrenia as a long-term outcome of pregnancy, delivery, and perinatal complications: a 28-year follow-up of the 1966 north Finland general population birth cohort. *Am J Psychiatry*. 1998;155(3):355-364.
43. Karlsson H, Blomstrom A, Wicks S, et al. Maternal antibodies to dietary antigens and risk for nonaffective psychosis in offspring. *Am J Psychiatry*. 2012;169(6):625-632.
44. Kendell RE, McInnery K, Juszcak E, Bain M. Obstetric complications and schizophrenia. Two case-control studies based on structured obstetric records. *Br J Psychiatry*. 2000;176:516-522.
45. Ketzer CR, Gallois C, Martinez AL, Rohde LA, Schmitz M. Is there an association between perinatal complications and attention-deficit/hyperactivity disorder-inattentive type in children and adolescents? *Braz J Psychiatry*. 2012;34(3):321-328.
46. Yeo J, Choi S, Joo Y, Kim H. Prenatal, perinatal and developmental risk factors of attention-deficit hyperactivity disorder. *J Korean Acad Child Adolesc Psychiatry*. 2015;26(2):112-119.
47. Kissin DM, Zhang Y, Boulet SL, et al. Association of assisted reproductive technology (ART) treatment and parental infertility diagnosis with autism in ART-conceived children. *Hum Reprod*. 2015;30(2):454-465.
48. Leivonen S, Voutilainen A, Chudal R, et al. Obstetric and Neonatal Adversities, Parity, and Tourette Syndrome: A Nationwide Registry. *J Pediatr*. 2016;171:213-219.
49. Maimburg RD, Vaeth M. Perinatal risk factors and infantile autism. *Acta Psychiatr Scand*. 2006;114(4):257-264.
50. Maramba LA, He W, Ming X. Pre- and perinatal risk factors for autism spectrum disorder in a New Jersey cohort. *J Child Neurol*. 2014;29(12):1645-1651.



51. Matsuishi T, Yamashita Y, Ohtani Y, et al. Brief report: incidence of and risk factors for autistic disorder in neonatal intensive care unit survivors. *J Autism Dev Disord.* 1999;29(2):161-166.
52. Micali N, Kothari R, Nam KW, et al. Eating disorder psychopathology, brain structure, neuropsychological correlates and risk mechanisms in very preterm young adults. *Eur Eat Disord Rev.* 2015;23(2):147-155.
53. Mrozek-Budzyn D, Majewska R, Kieltyka A. Prenatal, perinatal and neonatal risk factors for autism - Study in Poland. *Cent Eur J Med.* 2013;8(4):424-430.
54. Murray E, Pearson R, Fernandes M, et al. Are fetal growth impairment and preterm birth causally related to child attention problems and ADHD? Evidence from a comparison between high-income and middle-income cohorts. *J Epidemiol Community Health.* 2016;70(7):704-709.
55. O'Neill SM, Curran EA, Dalman C, et al. Birth by Caesarean Section and the Risk of Adult Psychosis: A Population-Based Cohort Study. *Schizophr Bull.* 2016;42(3):633-641.
56. Ordonez AE, Bobb A, Greenstein D, et al. Lack of evidence for elevated obstetric complications in childhood onset schizophrenia. *Biol Psychiatry.* 2005;58(1):10-15.
57. Polo-Kantola P, Lampi KM, Hinkka-Yli-Salomaki S, et al. Obstetric risk factors and autism spectrum disorders in Finland. *J Pediatr.* 2014;164(2):358-365.
58. Razaz N, Cnattingius S. Association between maternal body mass index in early pregnancy and anorexia nervosa in daughters. *Int J Eat Disord.* 2018;51(8):906-913.
59. Schieve LA, Tian LH, Baio J, et al. Population attributable fractions for three perinatal risk factors for autism spectrum disorders, 2002 and 2008 autism and developmental disabilities monitoring network. *Ann Epidemiol.* 2014;24(4):260-266.
60. Silva D, Colvin L, Hagemann E, Bower C. Environmental risk factors by gender associated with attention-deficit/hyperactivity disorder. *Pediatrics.* 2014;133(1):e14-22.
61. Sucksdorff M, Lehtonen L, Chudal R, et al. Lower Apgar scores and Caesarean sections are related to attention-deficit/hyperactivity disorder. *Acta Paediatr.* 2018;107(10):1750-1758.
62. Sussmann JE, McIntosh AM, Lawrie SM, Johnstone EC. Obstetric complications and mild to moderate intellectual disability. *Br J Psychiatry.* 2009;194(3):224-228.
63. Vasconcelos MS, Sampaio AS, Hounie AG, et al. Prenatal, perinatal, and postnatal risk factors in obsessive-compulsive disorder. *Biol Psychiatry.* 2007;61(3):301-307.
64. Winkler-Schwartz A, Garfinkle J, Shevell ML. Autism spectrum disorder in a term birth neonatal intensive care unit population. *Pediatr Neurol.* 2014;51(6):776-780.
65. Yip BHK, Leonard H, Stock S, et al. Caesarean section and risk of autism across gestational age: a multi-national cohort study of 5 million births. *Int J Epidemiol.* 2017;46(2):429-439.
66. Zhang X, Lv CC, Tian J, et al. Prenatal and perinatal risk factors for autism in China. *J Autism Dev Disord.* 2010;40(11):1311-1321.
